# Supplementary material for: Resistance and durability of fly ash based geopolymer for heavy metal immobilization: properties and mechanism
Source: Royal Society of Chemistry journal article supplement (doi:10.1039/d4ra00617h), 2024-01-01

1 **Table S1.** FA total composition analysis of different regions.

| Regions | Cl    | SiO <sub>2</sub> | Al <sub>2</sub> O <sub>3</sub> | CaO   | Fe <sub>2</sub> O <sub>3</sub> | MgO  | SO <sub>3</sub> | Others |
|---------|-------|------------------|--------------------------------|-------|--------------------------------|------|-----------------|--------|
| 1       | 27.32 | 3.33             | 1.00                           | 38.20 | 0.81                           | 2.00 | 11.37           | -      |
| 2       | 24.52 | 5.42             | 1.55                           | 35.26 | 1.04                           | 1.58 | 13.27           | -      |
| 3       | 29.32 | 3.30             | 0.95                           | 32.48 | 1.22                           | 2.12 | 15.21           | -      |
| 4       | 22.43 | 3.86             | 1.37                           | 35.22 | 0.45                           | 0.97 | 16.22           | -      |
| 5       | 26.32 | 4.27             | 1.06                           | 25.24 | 2.26                           | 3.32 | 14.25           | -      |

2 **Table S2.** FA total composition analysis of different batches.

| Batches | Cl    | SiO <sub>2</sub> | Al <sub>2</sub> O <sub>3</sub> | CaO   | Fe <sub>2</sub> O <sub>3</sub> | MgO  | SO <sub>3</sub> | Others |
|---------|-------|------------------|--------------------------------|-------|--------------------------------|------|-----------------|--------|
| 0317    | -     | 13.72            | 2.38                           | 33.20 | 0.87                           | 2.10 | 6.45            | -      |
| 0330    | -     | 14.60            | 3.25                           | 40.60 | 1.63                           | 3.14 | 6.54            | -      |
| 0416    | -     | -                | 2.69                           | 39.98 | 1.40                           | 2.45 | 4.92            | -      |
| 0422    | -     | -                | 1.57                           | 28.50 | 0.61                           | 1.91 | 5.46            | -      |
| 0512    | -     | -                | 3.10                           | 34.89 | 0.94                           | 2.70 | 5.67            | -      |
| 0704    | -     | 3.37             | 1.01                           | 38.20 | 0.81                           | 2.00 | 11.37           | -      |
| 0706    | 29.26 | 3.33             | 1.00                           | 38.31 | 0.73                           | 2.10 | 10.22           | -      |

3 **Table S3.** Heavy metal concentration of FA leaching test

| Heavy metal      | Standard | Detection limit | Measured value |
|------------------|----------|-----------------|----------------|
| As               | 0.30     | 0.0480          | 0.0303         |
| Ba               | 25.0     | 0.0006          | 1.2311         |
| Be               | 0.02     | 0.0001          | L              |
| Cd               | 0.15     | 0.0040          | 2.7009         |
| Total Cr         | 4.50     | 0.0030          | 0.0087         |
| Cu               | 40.0     | 0.0060          | 0.9388         |
| Hg               | 0.05     | 0.0180          | 0.0185         |
| Ni               | 0.50     | 0.0020          | L              |
| Pb               | 0.25     | 0.0090          | 0.3457         |
| Se               | 0.10     | 0.0540          | 0.0212         |
| Zn               | 100      | 0.0020          | 9.4980         |
| Cr <sup>6+</sup> | 1.50     | 0.0040          | 0.0050         |

4 \*L, lower than detection limit

5 **Table S4.** Cd and Pb concentration in different batches of FA leaching test

| Batches | Cd   | Pb   |
|---------|------|------|
| 0317    | 5.78 | 0.70 |
| 0330    | 0.12 | 23.6 |
| 0416    | 0.13 | 11.7 |
| 0416    | 0.02 | 2.96 |

|      |       |      |
|------|-------|------|
| 0422 | 0.12  | 19.3 |
| 0422 | 6.19  | 0.52 |
| 0512 | 0.12  | 12.9 |
| 0512 | 1.21  | 0.07 |
| 0520 | 0.99  | 0.10 |
| 0520 | 3.22  | 4.81 |
| 0528 | 0.00  | 2.83 |
| 0528 | 0.00  | 3.97 |
| 0704 | 6.12  | 1.37 |
| 0704 | 10.85 | 0.62 |
| 0706 | 7.32  | 1.71 |
| 0706 | 9.78  | 2.48 |

6 **Table S5.** Evaluation standard of chloride ion impermeability.

| 6h Electric flux (C) | chloride ion permeability |
|----------------------|---------------------------|
| >4000                | High                      |
| 2000~4000            | Mediate                   |
| 1000~2000            | Pore                      |
| 100~1000             | Extremely pore            |
| <100                 | Negligible                |

7 **Table S6.** Correspondence of accelerated carbonation age and the natural carbonation age

|                                 |    |    |    |     |
|---------------------------------|----|----|----|-----|
| Accelerated carbonation age (d) | 7  | 14 | 28 | 56  |
| Natural carbonation age (a)     | 13 | 26 | 51 | 102 |

8 **Table S7.** Component analysis of solid materials (X-ray Fluorescence Spectrometer)

| Chemical composition (%) | CaO   | SiO <sub>2</sub> | Al <sub>2</sub> O <sub>3</sub> | Na <sub>2</sub> O | K <sub>2</sub> O | Fe <sub>2</sub> O <sub>3</sub> | MgO | others |
|--------------------------|-------|------------------|--------------------------------|-------------------|------------------|--------------------------------|-----|--------|
| Metakaolin               | 1.43  | 57.61            | 34.41                          | 2.2               | 1.63             | 0.67                           | 0.8 | 1.25   |
| Slag                     | 36.99 | 31.53            | 16.45                          | 0.8               | 0.71             | 1.04                           | 7.8 | 4.68   |

9

10

11

12

13

14

15

16

**Table S8.** Comparative analysis of measured values of pollutants in ground polymerization curing body and the requirements of standard limits

| No. | Project    | Cu                                                                                            | Zn     | Cd      | Pb      | Cr      | Cr <sup>+6</sup> | Hg     | Ni      | As     | Fluoride | Dioxin |
|-----|------------|-----------------------------------------------------------------------------------------------|--------|---------|---------|---------|------------------|--------|---------|--------|----------|--------|
| 1   | GB5085.3   | 100                                                                                           | 100    | 1       | 5       | 15      | 5                | 0.1    | 5       | 5      | 100      | —      |
| 2   | Test value | 0.0232                                                                                        | 0.0335 | 0.00012 | 0.00272 | 0.00768 | ND               | 0.0007 | 0.00654 | 0.0084 | 0.28     |        |
| 3   | GB5085.6   | All compounds limit values in Appendix B require <3% (0.783% measured value for all elements) |        |         |         |         |                  |        |         |        |          | ≤15000 |
| 4   | Test value | —                                                                                             | 1050   | 52.2    | 347     | —       | —                | 9.42   | 10.1    | 11.1   | 850      | 18     |
| 5   | GB8978     | —                                                                                             | —      | 0.1     | 1.0     | 1.5     | 0.5              | 0.05   | 1.0     | 0.5    | —        | —      |
| 6   | Test value | —                                                                                             | —      | 0.00012 | 0.00272 | 0.00768 | ND               | 0.0007 | 0.00654 | 0.0084 | —        | —      |
| 7   | GB36600    | —                                                                                             | —      | 65      | 800     | —       | —                | 38     | 900     | 60     | —        | 40     |
| 8   | Test value | —                                                                                             | —      | 52.2    | 347     | —       | —                | 9.42   | 10.1    | 11.1   | —        | 18     |
| 9   | GB14848    | 1                                                                                             | 1      | 0.005   | 0.01    | —       | 0.05             | 0.001  | 0.02    | 0.01   | 1        | —      |
| 10  | Test value | 0.0232                                                                                        | 0.0335 | 0.00012 | 0.00272 | —       | ND               | 0.0007 | 0.00654 | 0.0084 | 0.28     | —      |
| 11  | GB3838     | 1                                                                                             | 1      | 0.005   | 0.05    | —       | 0.05             | 0.001  | —       | 0.05   | 1        | —      |
| 12  | Test value | 0.0232                                                                                        | 0.0335 | 0.00012 | 0.00272 | —       | ND               | 0.0007 | —       | 0.0084 | 0.28     | —      |
| 13  | GB16889    | 40                                                                                            | 100    | 0.15    | 0.25    | 4.5     | 1.5              | 0.05   | 0.5     | 0.3    | —        | 3000   |
| 14  | Test value | 0.09                                                                                          | 0.03   | 0.04    | 0.02    | 0.9     | ND               | ND     | ND      | ND     | —        | 18     |

17 Remarks: (1) GB5085.3 is 《Hazardous Waste Identification Standards for Leaching Toxicity Identification》 (GB5085.3-2007), GB5085.6 is 《Hazardous Waste  
18 Identification Standards for Toxic Substance Content》 (GB5085.6-2007); (2) GB8978 is 《Comprehensive Emission Standards for Sewage》 (GB8978-2002); (3) GB36600  
19 is 《Soil Environmental Quality Construction Land Soil Pollution Risk Control Standards》 (GB36600-2018); (4) GB14848 is 《Groundwater Quality Standards》  
20 (GB36600-2018); (5) GB14848 is 《Groundwater Quality Standards》 (GB36600-2018); (6) GB14848 is 《Groundwater Quality Standards》 (GB36600-2018) GB36600  
21 for 《Soil Environmental Quality Soil Pollution Risk Control Standards for Construction Land》 (GB36600-2018); (4) GB14848 for 《Groundwater Quality  
22 Standards》 (GB14848-2017); (5) GB3838 for 《Environmental Quality Standards for Surface Waters》 (GB 3838-2002); (6) GB16889 for 《Domestic Landfill Pollution  
23 Control Standards》 (GB16889-2008). (7) The numerical unit in GB5085.3, GB8978, GB14848, GB3838 and GB16889 is mg/L; the numerical unit in GB5085.6 and  
24 GB36600 is mg/kg; and the duality equivalent unit is ng-TEQ/kg. (8) All the above standard documents are from the Ministry of Ecology and Environment of the People's  
25 Republic of China (<https://www.mee.gov.cn/>)

26 **Test S1.**

27 To commence the experiment, extracted a 10g section of the specimen. Proceeded by  
28 incorporating the leaching agent in a 20:1 ratio. Subsequently, positioned the sample on the turnover  
29 oscillator and setted the rotation speed to  $30 \pm 2R/min$ . Allowed the sample to oscillate for a duration  
30 of  $18 \pm 2$  hours. The leaching concentration of heavy metals in the FA or geopolymer were assessed  
31 using a HJ-E005 atomic absorption spectrophotometer.

32 
$$\varphi = \frac{A_0 - A_1}{A_0} \times 100\% \quad \text{Eq S1}$$

33 Where:  $\varphi$  — curing rate of heavy metal ion, %;

34  $A_0$  — leaching concentration of heavy metal ions in fly ash before solidification treatment, mg/L;

35  $A$  — Leaching concentration of heavy metal ions in the solidified body after solidification treatment,  
36 mg/L.

37 **Test S2.**

38 The solidified body test blocks were prepared by following the specified test ratio, wherein three  
39 cylindrical test specimens were prepared for each group. Each test specimen had a diameter of  $100 \pm 1$   
40 mm and a height of  $50 \pm 2$  mm. Following the act of being erected, the test pieces were subsequently  
41 transferred to a curing box that maintains a consistent temperature and humidity for a duration of 24  
42 hours. Subsequently, the formwork was detached. The hardened body obtained following the removal  
43 of the formwork was immersed in clean water for a period of 28 days to facilitate the curing process. The  
44 employed methodology was the electric flux test method. Initially, the solidified body's test blocks  
45 underwent vacuum saturation before tested. The test block was placed within a vacuum container,  
46 whereby the vacuum pressure within the container was gradually dropped by 1-5K Pa over a span of 5  
47 minutes. Subsequently, the vacuum level was maintained for a duration of 3 hours. Subsequently,

48 deionized water was added into the vacuum vessel until the test block was fully immersed. After the  
49 restoration of normal pressure, it was recommended to maintain immersion for a duration of  $18 \pm 2$  hours.  
50 Once the vacuum water saturation process was completed, the test specimen was removed, any surplus  
51 water present on its surface was wiped away, and subsequently, the test specimen was carefully  
52 positioned within a mold. Finally, the bolt was securely fastened to affix and seal the test specimen in  
53 place. Upon verifying the integrity of the mold, a 0.3 mol/L NaOH solution and a 3% NaCl solution were  
54 introduced to the positive and negative electrodes of the power supply, respectively. Following the  
55 completion of the inspection, proceeded to activate the power supply and proceed with the task of  
56 documenting the values of current A and current C at regular intervals of 15 minutes. The precise  
57 magnitudes of the current and electric flux were precisely 0.01 milliamperes and 0.01 coulombs,  
58 respectively.

### 59 **Test S3.**

60 The detailed process steps were as follows:

- 61 a. The dried FA solidified body samples were placed on an iron frame in a carbonization box, and  
62 the distance between the carbonized surfaces of each group were at least 50mm;
- 63 b. Carbonation test should be carried out in accordance with Standard for Test Methods of Long-  
64 term Performance and Durability of Ordinary Concrete (GB/T50082-2009);
- 65 c. At 3, 7, 14, and 28 days after carbonization, the samples of the solidified body were taken out and  
66 broken to measure the carbonization depth. By comparing the depth of artificial carbonation with that in  
67 the reference, the corresponding actual carbonation ages were determined, which were used as a standard  
68 to support the corresponding age of the carbonation acceleration test of the FA-based geopolymer;
- 69 d. After carbonization for 7, 14, 28 and 56 days, the FA-based geopolymers were taken out and then

70 sprayed with or dropped with 1% phenolphthalein alcohol solution (containing 20% distilled water).  
71 After 30 seconds, the carbonation depth of the solidified body sample should be measured with the  
72 carbonation depth measuring ruler according to the original marking of one measuring point every 10  
73 mm.

74 e. Confirmed the carbonization depth for a certain carbonization time according to the above steps,  
75 take three groups of samples respectively, and taken out the FA-based geopolymer with the same  
76 carbonization depth to carry out the heavy metal leaching test of the solidified body according to HJ/T  
77 300-2007 and HJ/T 299-2007 respectively to determine the pH value of the leaching solution and the  
78 leaching toxicity of heavy metals. At the same time, the FA-based geopolymers were leached with the  
79 same amount of water (the same quality as the acetic acid leaching solution), and the pH value and heavy  
80 metal leaching toxicity of the leaching solution were tested.

81 The natural carbonation ages could be calculated by:

$$82 \quad D_2 = D_1 \sqrt{\frac{t_2 C_2}{t_1 C_1}} \quad \text{Eq S2}$$

83 Where,  $D_2$ , natural carbonation depth;

84  $D_1$ , accelerated carbonation depth;

85  $t_1$ , accelerated carbonation age;

86  $t_2$ , natural carbonation age

87  $C_1$ , CO<sub>2</sub> concentration of accelerated carbonation, 20%;

88  $C_2$ , CO<sub>2</sub> concentration of natural carbonation, 0.03%.

## 89 **Figures**

90 **Figure S1.** Soaking processes diagram of geopolymer and test blocks after soaking.

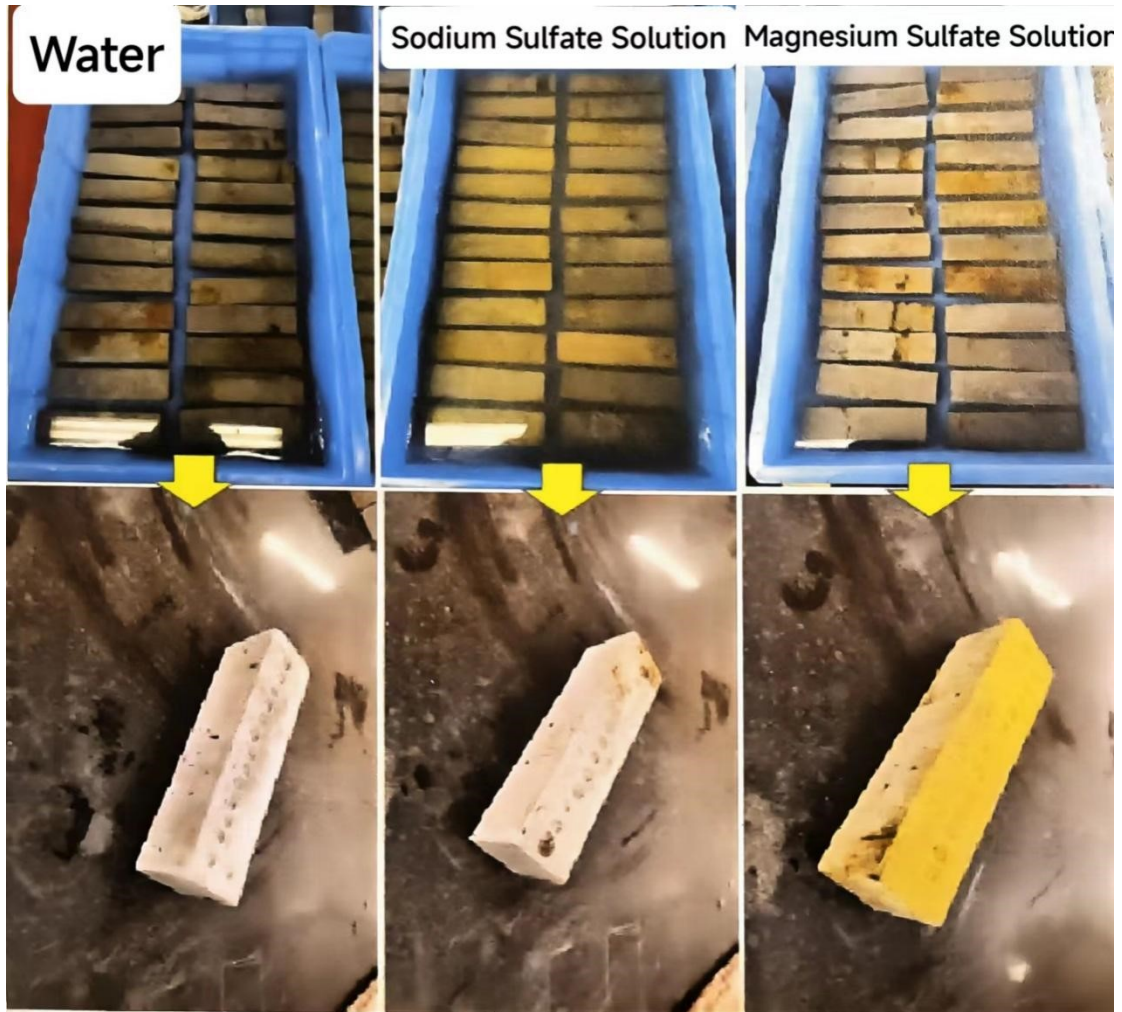

91

92 **Figure S2.** Ddiagram of scheme representing the Synthesis of FA based geopolymer process

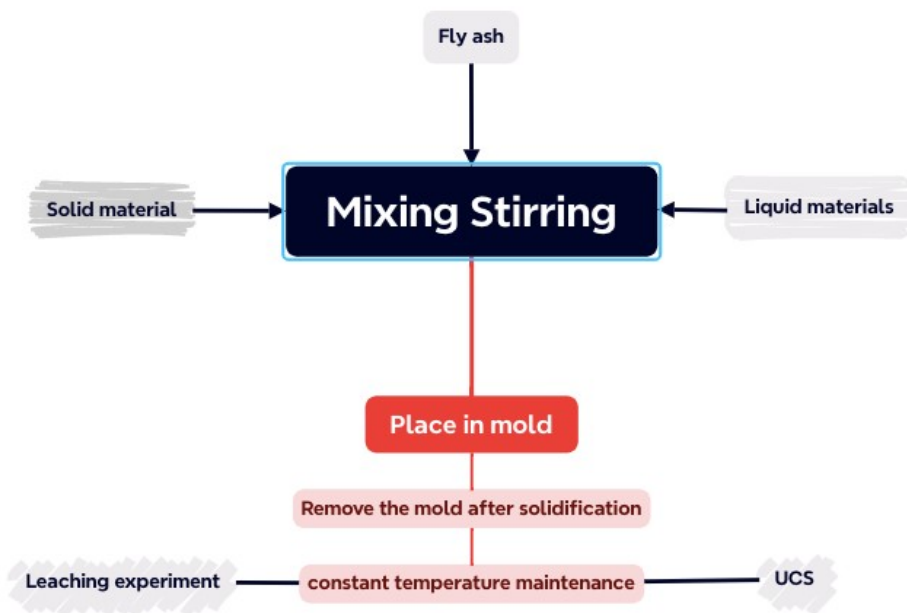

93

94 **Figure S3.** Scanning electron micrograph of raw material before synthesis ( a.Metakaolin b.Slag

95 )

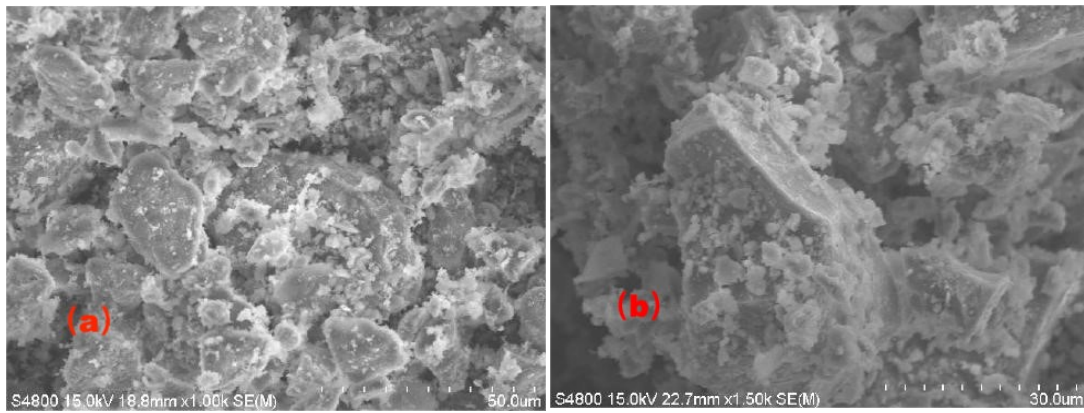

Supplement: d4ra00617h1.pdf [file d4ra00617h1.pdf]
